# Supplementary material for: Tubulin Tyrosination Is Required for the Proper Organization and Pathfinding of the Growth Cone
Source: PubMed Central journal article supplement (PMC2672595; doi:10.1371/journal.pone.0005405), 2009-04-30
Supplement: pone.0005405.s003.pdf [file pone.0005405.s003.pdf]

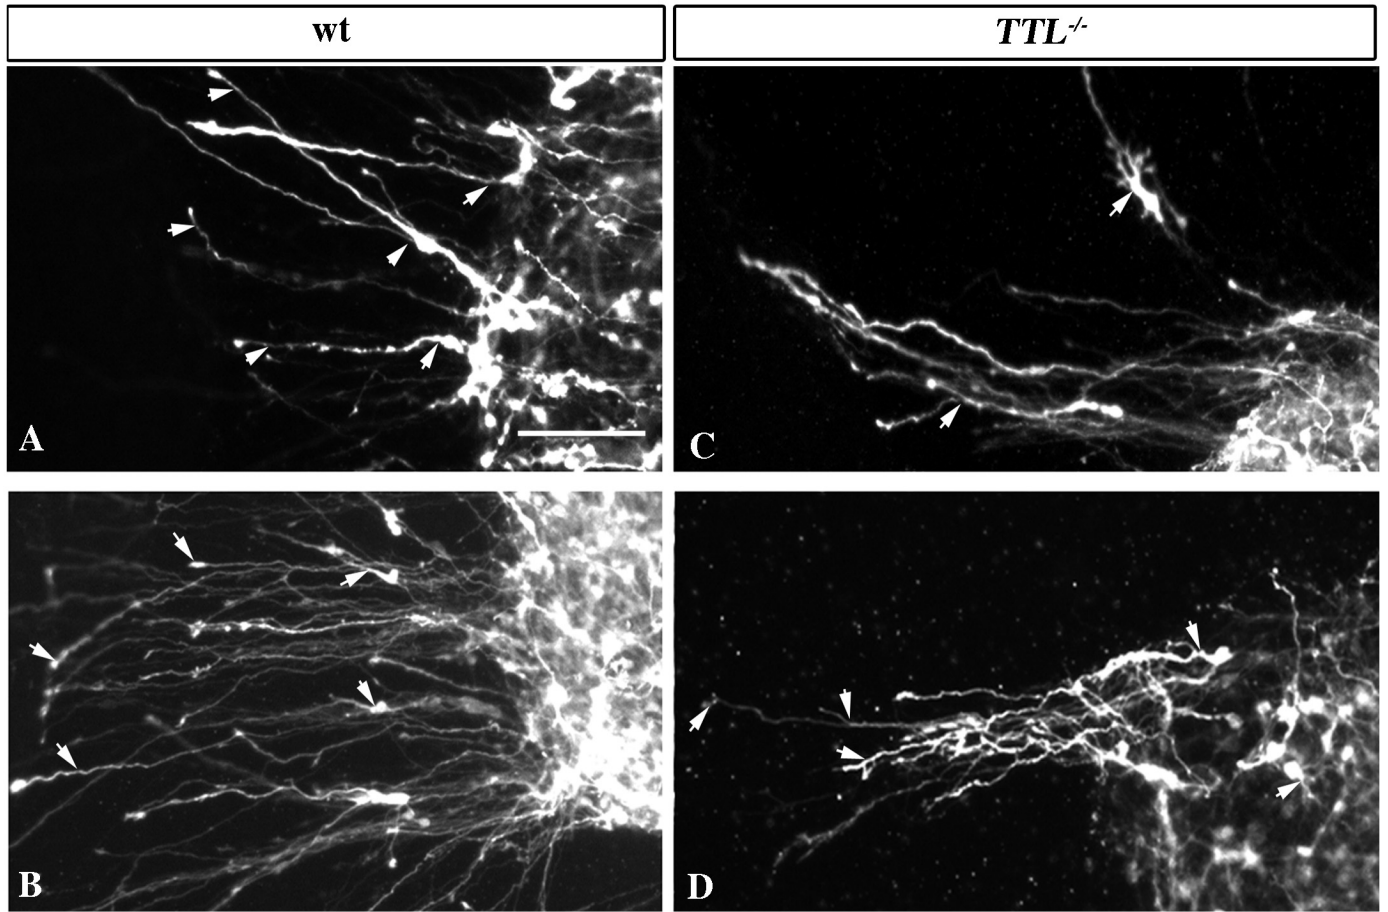

**Supplemental Figure S3**
